# Supplementary material for: MetaSim—A Sequencing Simulator for Genomics and Metagenomics
Source: PLoS One. 2008 Oct 8;3(10):e3373. doi: 10.1371/journal.pone.0003373 (PMC2556396; doi:10.1371/journal.pone.0003373)
Supplement: Table S1 — Complete list of simulation results. A complete list of all results of the nine conducted simulation runs evaluated with MEGAN. (0.04 MB XLS) [file pone.0003373.s002.xls]

## Sheet: Sheet1
		simLC				454-100						454-250						Sanger-800
						Nr Reads:			150000			Nr Reads:			60000			Nr Reads:			18750
#	Abdce	Species	GI	Taxid	bp	#sampled	#assigned	#TP	%sampled	%assigned	%TP	#sampled	#assigned	#TP	%sampled	%assigned	%TP	#sampled	#assigned	#TP	%sampled	%assigned	%TP
1	90	Methanoculleus marisnigri JR1	126177952	368407	2478101	124047	95339	95339	82.698	76.8572	100	49565	45880	45880	82.6083	92.5653	100	15509	15366	15366	82.7147	99.078	100
2	10	Escherichia coli str. K-12 substr. MG1655	49175990	511145 (83333)	4639675	25953	651	651	17.302	2.50838	100	10435	472	472	17.3917	4.52324	100	3241	192	192	17.2853	5.9241	100
		simMC				454-100						454-250						Sanger-800
						Nr Reads:			150000			Nr Reads:			60000			Nr Reads:			18750
#	Abdce	Species	GI	Taxid	bp	#sampled	#assigned	#TP	%sampled	%assigned	%TP	#sampled	#assigned	#TP	%sampled	%assigned	%TP	#sampled	#assigned	#TP	%sampled	%assigned	%TP
1	100	Pseudomonas fluorescens PfO-1	77456228	205922	6438405	57635	33213	33194	38.4233	57.6264	99.9428	23033	18415	18405	38.3883	79.9505	99.9457	7150	6556	6555	38.1333	91.6923	99.9847
2	100	Shigella dysenteriae Sd197	82775382	300267	4369232	38905						15778						4899
		Shigella dysenteriae Sd197 plasmid pSD197_spA	145294016		8953	81						29						13
		Shigella dysenteriae Sd197 plasmid pSD1_197	82524407		182726	1615						674						198
					4560911	40601	4323	4083	27.0673	10.6475	94.4483	16481	2728	2718	27.4683	16.5524	99.6334	5110	1055	1055	27.2533	20.6458	100
3	80	Pasteurella multocida subsp. multocida str. Pm70	15601865	272843	2257487	16234	10456	10452	10.8227	64.408	99.9617	6523	5448	5447	10.8717	83.5199	99.9816	2026	1859	1859	10.8053	91.7572	100
4	50	Buchnera aphidicola str. APS (Acyrthosiphon pisum)	15616630	107806	640681	2885						1135						324
		Buchnera aphidicola str. APS (Acyrthosiphon pisum) plasmid pLeu	10957103		7786	33						19						6
		Buchnera aphidicola str. APS (Acyrthosiphon pisum) plasmid pTrp	10957099		7258	39						11						4
					655725	2957	2159	2149	1.97133	73.0132	99.5368	1165	995	993	1.94167	85.4077	99.799	334	312	312	1.78133	93.4132	100
5	50	Francisella tularensis subsp. tularensis Schu 4	56707187	177416	1892819	8531	409	409	5.68733	4.79428	100	3357	307	307	5.595	9.14507	100	1043	127	127	5.56267	12.1764	100
6	25	Alcanivorax borkumensis SK2	110832861	393595	3120143	7025	5098	5087	4.68333	72.5694	99.7842	2744	2455	2454	4.57333	89.4679	99.9593	863	847	847	4.60267	98.146	100
7	25	Candidatus Blochmannia floridanus	33519483	203907	705557	1543	1135	1130	1.02867	73.558	99.5595	649	569	569	1.08167	87.6733	100	226	214	214	1.20533	94.6903	100
8	25	Pseudomonas entomophila L48	104779316	384676	5888780	13328	6761	6690	8.88533	50.7278	98.9499	5189	3802	3770	8.64833	73.2704	99.1583	1736	1524	1518	9.25867	87.788	99.6063
9	5	Escherichia coli str. K12 substr. MG1655	49175990	511145 (83333)	4639675	2146	62	53	1.43067	2.8891	85.4839	859	64	46	1.43167	7.45052	71.875	262	15	14	1.39733	5.72519	93.3333
		simHC				454-100						454-250						Sanger-800
						Nr Reads:			150000			Nr Reads:			60000			Nr Reads:			18750
#	Abdce	Species	GI	Taxid	bp	#sampled	#assigned	#TP	%sampled	%assigned	%TP	#sampled	#assigned	#TP	%sampled	%assigned	%TP	#sampled	#assigned	#TP	%sampled	%assigned	%TP
1	100	Campylobacter jejuni subsp. jejuni 81-176	121612099	354242	1616554	5013						2055						641
		Campylobacter jejuni subsp. jejuni 81-176 plasmid pTet	121999251		45025	132						59						9
		Campylobacter jejuni subsp. jejuni 81-176 plasmid pVir	121582657		37473	130						47						20
					1699052	5275	334	334	3.51667	6.33175	100	2161	195	195	3.60167	9.0236	100	670	68	68	3.57333	10.1493	100
2	100	Archaeoglobus fulgidus DSM 4304	11497621	224325	2178400	6811	5437	5437	4.54067	79.8268	100	2648	2532	2532	4.41333	95.6193	100	853	833	833	4.54933	97.6553	100
3	100	Lactococcus lactis subsp. cremoris SK11	116510843	272622	2438589	7577						2989						983
		Lactococcus lactis subsp. cremoris SK11 plasmid 1	116326529		14041	45						17						2
		Lactococcus lactis subsp. cremoris SK11 plasmid 2	116326540		9554	33						9						3
		Lactococcus lactis subsp. cremoris SK11 plasmid 3	116326547		74750	219						82						27
		Lactococcus lactis subsp. cremoris SK11 plasmid 4	116326609		47208	154						81						17
		Lactococcus lactis subsp. cremoris SK11 plasmid 5	116326645		14206	44						15						6
					2598348	8072	1789	1789	5.38133	22.163	100	3193	1145	1145	5.32167	35.8597	100	1038	456	456	5.536	43.9306	100
4	100	Sulfolobus tokodaii str. 7	24473558	273063	2694756	8465	6354	6354	5.64333	75.062	100	3356	2966	2965	5.59333	88.379	99.9663	1050	1005	1005	5.6	95.7143	100
5	100	Nitrosomonas europaea ATCC 19718	30248031	228410	2812094	8722	5415	5415	5.81467	62.0844	100	3396	2877	2876	5.66	84.7173	99.9652	1049	984	984	5.59467	93.8036	100
6	100	Bdellovibrio bacteriovorus HD100	42521650	264462	3782950	11766	9512	9509	7.844	80.8431	99.9685	4672	4494	4493	7.78667	96.1901	99.9777	1468	1454	1454	7.82933	99.0463	100
7	100	Clostridium acetobutylicum ATCC 824	15893298	272562	3940880	12294						4916						1513
		Clostridium acetobutylicum ATCC 824 plasmid pSOL1	15004705		192000	600						218						78
					4132880	12894	9841	9839	8.596	76.3223	99.9797	5134	4688	4687	8.55667	91.3128	99.9787	1591	1529	1529	8.48533	96.1031	100
8	100	Agrobacterium tumefaciens str. C58 chromosome circular	159184118	176299	2841580	8795						3558						1075
		Agrobacterium tumefaciens str. C58 chromosome linear	159185562		2075577	6463						2528						770
		Agrobacterium tumefaciens str. C58 plasmid At	159186452		542868	1631						675						191
		Agrobacterium tumefaciens str. C58 plasmid Ti	159161952		214233	644						263						84
					5674258	17533	11345	11343	11.6887	64.7066	99.9824	7026	5984	5984	11.71	85.1694	100	2120	1979	1979	11.3067	93.3491	100
9	100	Anabaena variabilis ATCC 29413	75906225	240292	6365727	19863						8034						2450
		Anabaena variabilis ATCC 29413 plasmid A	75812284		366354	1115						454						148
		Anabaena variabilis ATCC 29413 plasmid B	75812629		35762	109						53						14
		Anabaena variabilis ATCC 29413 plasmid C	75812661		300758	929						379						129
					7068601	22016	9552	9552	14.6773	43.3866	100	8920	5438	5437	14.8667	60.9641	99.9816	2741	2164	2164	14.6187	78.9493	100
10	100	Pseudomonas aeruginosa PA7	152983466	381754	6588339	20471	6533	6532	13.6473	31.9134	99.9847	8172	4043	4043	13.62	49.4738	100	2625	1670	1670	14	63.619	100
11	100	Streptomyces coelicolor A3(2)	32141095	100226	8667507	26799						10852						3367
		Streptomyces coelicolor A3(2) plasmid SCP1	21233999		356023	1069						430						167
		Streptomyces coelicolor A3(2) plasmid SCP2	21233964		31317	107						40						11
					9054847	27975	18335	18327	18.65	65.5407	99.9564	11322	9546	9542	18.87	84.3137	99.9581	3545	3362	3362	18.9067	94.8378	100
